# Supplementary material for: Long divergent haplotypes introgressed from wild sheep are associated with distinct morphological and adaptive characteristics in domestic sheep
Source: PLoS Genet. 2023 Feb 23;19(2):e1010615. doi: 10.1371/journal.pgen.1010615 (PMC9949681; doi:10.1371/journal.pgen.1010615)
Supplement: S7 Table — (XLSX) [file pgen.1010615.s039.xlsx]

## Sheet: S7_Table
S7_TableThe maps and photos were downloaded with the Creative Commons license or taken by ourself.
Figures	Species/breeds	Author	Sources	Licences
Fig 1	Map base player	Kohelet	https://commons.wikimedia.org/wiki/File:Polio_worldwide_2012.svg	Public domain
Fig 1	Ovis nivicola (Snowsheep)	Joseph Smit	https://upload.wikimedia.org/wikipedia/commons/thumb/7/7e/Ovis_nivicola_%28%3DO._canadensis_nivicola%29_by_Joseph_Smit.jpg/330px-Ovis_nivicola_%28%3DO._canadensis_nivicola%29_by_Joseph_Smit.jpg	Public domain
Fig 1	Ovis canadensis (Bighorn)	Unknown	https://www.quanjing.com/imgbuy/qj6373823269.html	For free
Fig 1	Ovis dalli (Thinhorn)	Unknown	https://www.quanjing.com/imgbuy/qj8157024283.html	For free
Fig 1	Ovis ammon (Argali)	Unknown / F. A. Brockhaus	https://simple.wikipedia.org/wiki/File:Argali.jpg	Public domain
Fig 1	Ovis vignei (Urial)	Altaipanther	https://upload.wikimedia.org/wikipedia/commons/thumb/7/73/Ovis_ammon_vignei_arkal_Pretoria_3.jpg/180px-Ovis_ammon_vignei_arkal_Pretoria_3.jpg	Public domain
Fig 1	Ovis orientalis (IR_MOU)	Kristina Rasmussen	https://pixabay.com/ja/photos/mouflon-%e9%87%8e%e7%94%9f-4339348/	For free
Fig 1	Ovis musimon (EU_MOU)	Rabensteiner	https://commons.wikimedia.org/wiki/File:Ovis_orientalis_musimon.jpg	Public domain
Fig 4	East Friesian Sheep (Ram)	Zhuangbiao Zhang	Taken by ourself
Fig 4	East Friesian Sheep (Ewe)	Zhuangbiao Zhang	Taken by ourself
Fig 4	Awassi sheep (Ram)	Flickr	https://commons.wikimedia.org/wiki/File:Kuwaiti_sheep.jpg	CC BY 2.0
Fig 4	Awassi sheep (Ewe)	ihcetiner	https://pixabay.com/photos/awassi-sheep-sanliurfa-individual-2932688/	For free
Fig 4	Scottish Blackface (Ram)	Unknown	https://pikwizard.com/photo/sheep-ram-bovid/6e8f407cedf32d2f4278da4a0ddc4aae	For free
Fig 4	Scottish Blackface (Ewe)	Unknown	https://sheep.fandom.com/wiki/Scottish_Blackface	For free
Fig 5	Swiss White Alpine	Adrian Steiner	https://www.researchgate.net/publication/236073755_Occurrence_of_congenital_disorders_in_Swiss_sheep	CC BY 2.0
Fig 5	Finnsheep	LukasElley	https://pixabay.com/photos/animals-sheep-finnsheep-mammals-7130404/	For free
Fig 5	Waggir sheep	Yu Jiang	Taken by ourself
Fig S2	Map base player	unknown	https://d-maps.com/carte.php?num_car=5494&lang=zh	For free
